# Supplementary material
Source: MDPI journal article supplement (https://www.mdpi.com/2304-6740/6/1/7)
Supplement: s1 [file s1]

# Field-Induced Slow Magnetic Relaxation of Mononuclear and Dinuclear Dysprosium(III) Complexes Coordinated by a Chloranilate with Different Resonance Forms

Ryuta Ishikawa, Shoichi Michiwaki, Takeshi Noda, Keiichi Katoh, Masahiro Yamashita, Kouki Matsubara and Satoshi Kawata

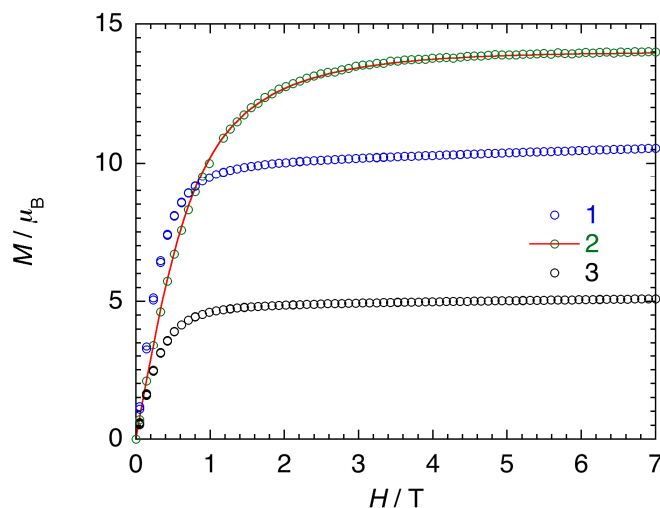

**Figure S1.** Field dependence of magnetization plots of 1–3 at 1.8 K. The solid red lines were fitted to the data as described in the text.

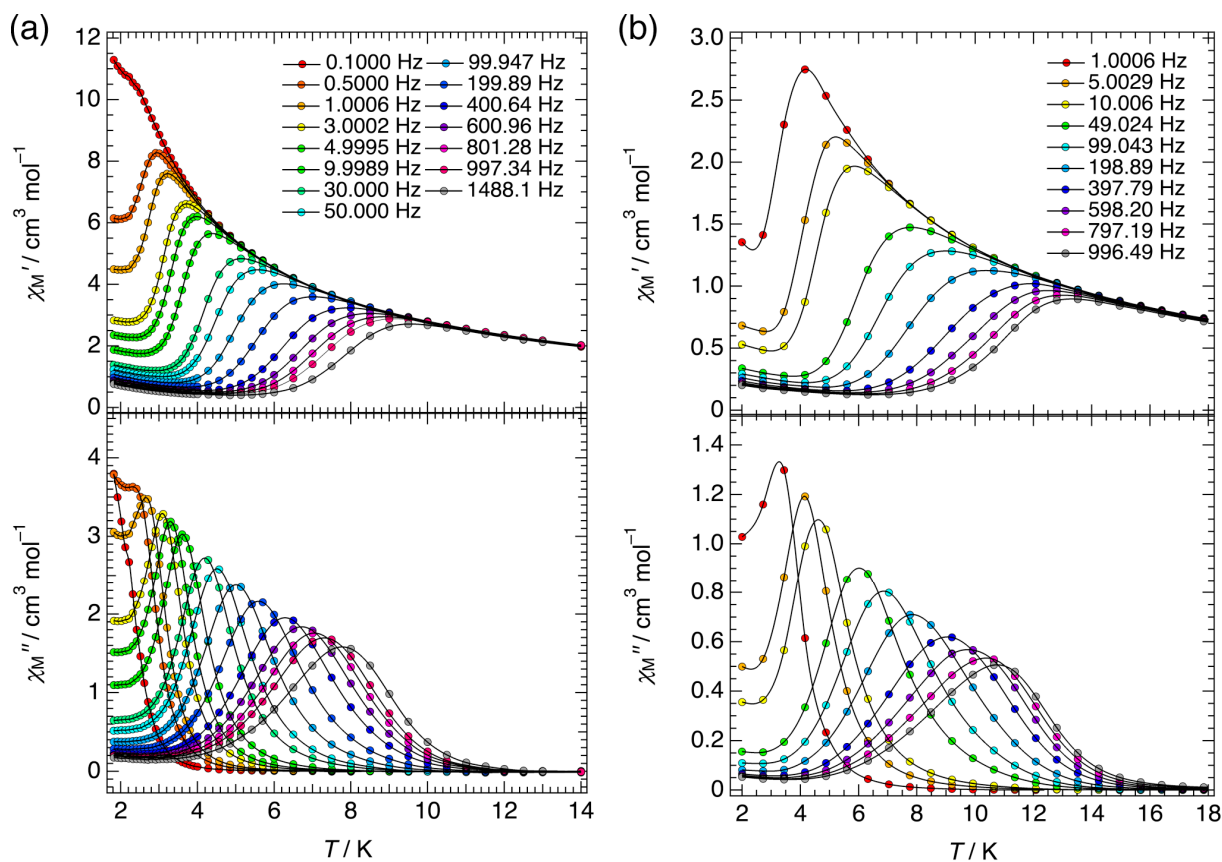

**Figure S2.** Temperature dependence of  $\chi_M'$  and  $\chi_M''$  products at given frequencies in an applied DC field of 950 Oe for 1 (a) and 1500 Oe for 3 (b), respectively. Solid black lines serve as guides.
